# Supplementary material for: Poly Organotin Acetates against DNA with Possible Implementation on Human Breast Cancer
Source: MDPI journal article supplement (doi:10.3390/ijms19072055), 2018-07-14
Supplement: s1 [file s1]

# Supplementary Material Information

## Poly Organotin Acetates against DNA with Possible Implementation on Human Breast Cancer

G.K. Latsis<sup>1</sup>, C.N. Banti<sup>1,\*</sup>, N. Kourkouvelis<sup>2,\*</sup>, C. Papatriantafyllopoulou<sup>3</sup>, N. Panagiotou<sup>3</sup>, A. Tasiopoulos<sup>3</sup>, A. Douvalis<sup>4</sup>, A.G. Kalampounias<sup>5</sup>, T. Bakas<sup>4</sup>, S.K. Hadjidakou<sup>1,\*</sup>

<sup>1</sup> Section of Inorganic and Analytical Chemistry, Department of Chemistry, University of Ioannina, 45110 Ioannina, Greece

<sup>2</sup> Medical Physics Laboratory, Medical School, University of Ioannina, Greece

<sup>3</sup> Department of Chemistry, University of Cyprus, 1678 Nicosia, Cyprus

<sup>4</sup> Mössbauer Spectroscopy and Physics of Material Laboratory, Department of Physics, University of Ioannina, Greece

<sup>5</sup> Physical Chemistry Laboratory, Department of Chemistry, University of Ioannina, Greece

\* All correspondence should be addressed to: Dr C.N. Banti (Post Doctoral Fellow); e-mail: cbanti@cc.uoi.gr; Dr. N. Kourkouvelis (Assistant Professor); e-mail: nkourkou@uoi.gr; Professor Dr S.K. Hadjidakou; e-mail: shadjika@uoi.gr; tel. xx30-26510-08374

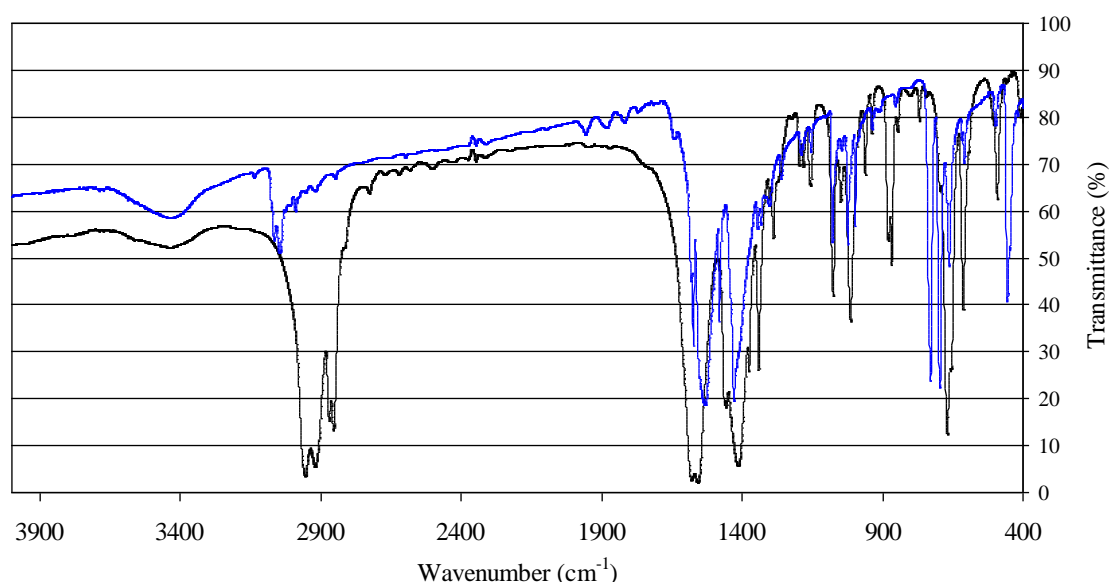

Figure S1. FT-IR spectra of **1** (—) and **2** (---).

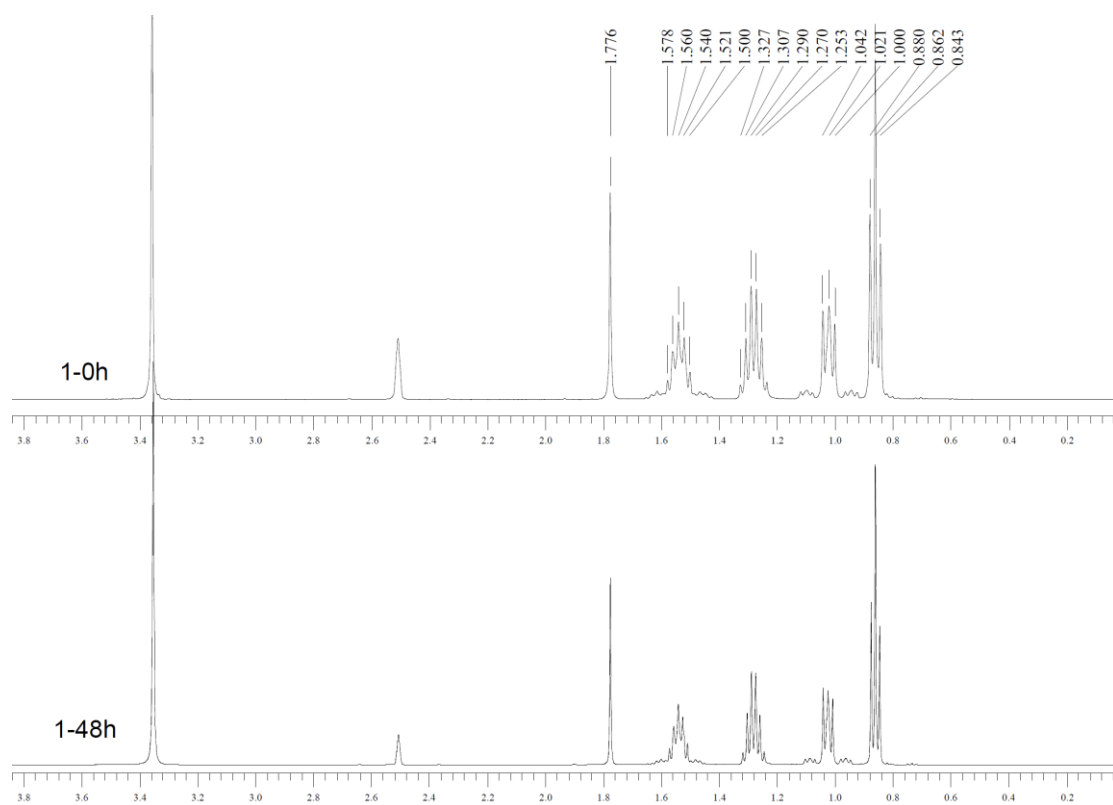

(A)

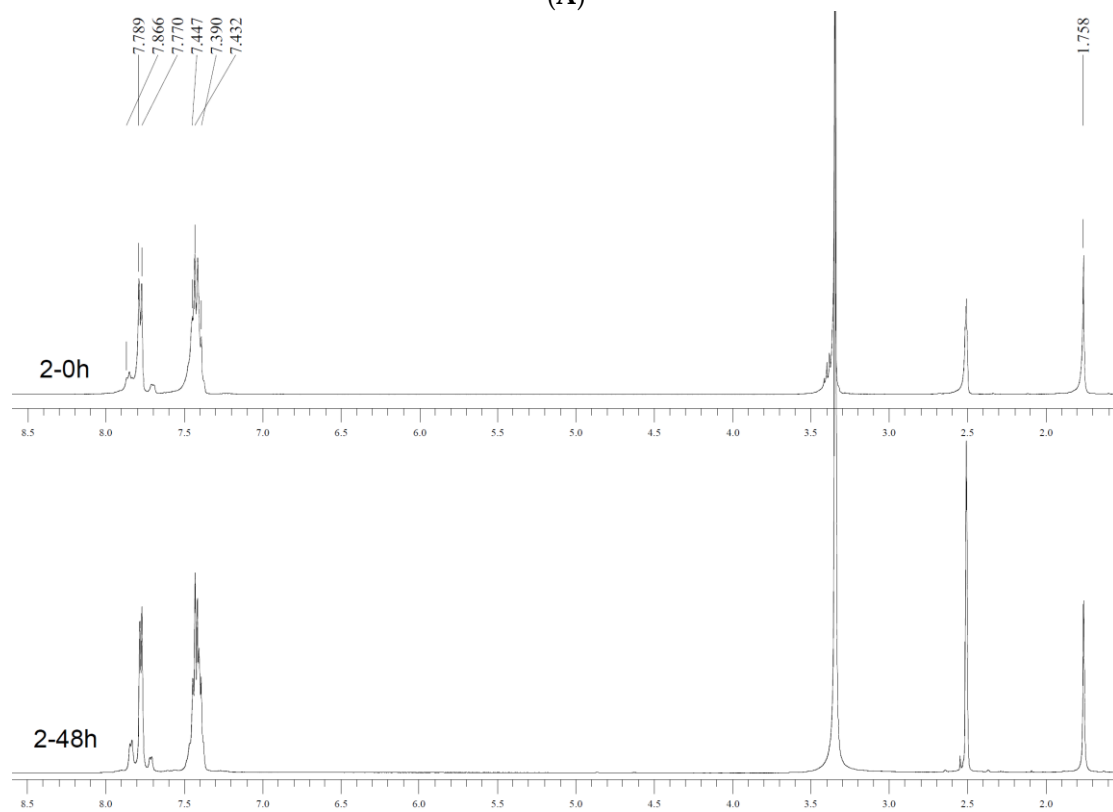

(B)

Figure S2.  $^1\text{H}$ -NMR spectra of 1 (A) and 2 (B).

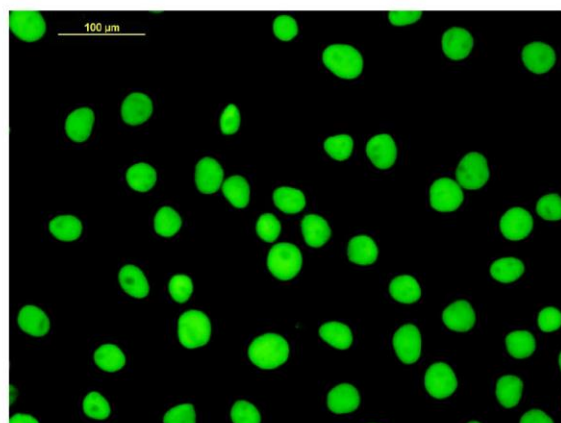

Control

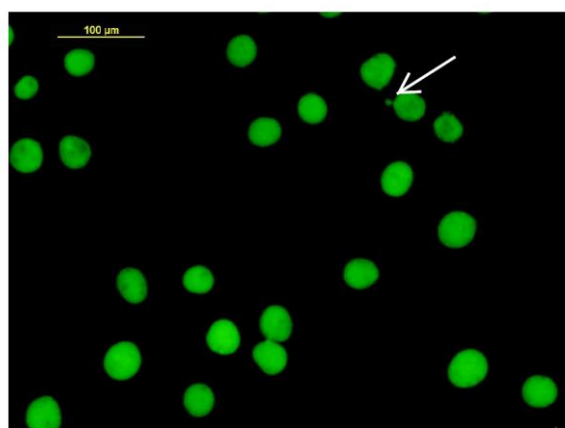

1

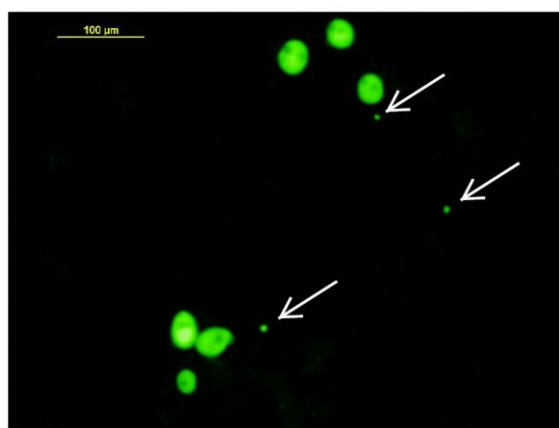

2

**Figure S3.** Micronucleus observed in the culture of MRC-5 cells in untreated and treated with **1** and **2** at their  $IC_{50}$  value for a period of 48 h, arrow indicates micronucleus in MRC-5 cells.
